# Supplementary material for: Two major metabolic factors for an efficient NADP-malic enzyme type C4 photosynthesis
Source: PubMed Central journal article supplement (PMC9070817; doi:10.1093/plphys/kiac051), 2022-02-15

# Supplemental Figure

Figure S1. The response curves of photosynthesis to the fold changes of enzymatic capacity. Note: CA: Carbonic anhydrase; PEPC: Phosphoenolpyruvate carboxylase; NADP-MDH: Malate dehydrogenase (NADP<sup>+</sup>); NADP-ME: NADP-Malic enzyme; PPK: Pyruvate, phosphate dikinase; Rubisco: Ribulose-bisphosphate carboxylase; SBPA: Sedoheptulose-bisphosphate aldolase; SBPase: Sedoheptulose-bisphosphatase; Tka: Transketolase; TKb: Transketolase; PRK: Phosphoribulokinase; PGCAP: Phosphoglycolate phosphatase; GO: Glycollate oxidase; GGAT: Glutamate Glyoxylate aminotransferase; GDC: Glycine decarboxylase; SGAT: Serine Glyoxylate aminotransferase; HPR: Glycerate dehydrogenase; GLYK: Glycerate Kinase; Aldolase<sub>MC</sub>: Fructose-bisphosphate aldolase in the mesophyll cell chloroplast; FBPase<sub>MC</sub>: Fructose-bisphosphatase in the mesophyll cell chloroplast; UGPU: UTP-glucose-1-phosphate uridylyltransferase; SPS: Sucrose phosphate synthase; SPP: Sucrose phosphatase; PFK: 6-phosphofructo-2-kinase; F26BPP: fructose-2,6-bisphosphate 2-phosphatase; GPA: Glucose-1-phosphate adenylyl transferase; Diphosphatase: inorganic diphosphatase; Starch Synthase: ADPG Pyrophospho-rylase; ATPase<sub>MC</sub>: ATP synthase in the mesophyll cell chloroplast; FNR: Ferredoxin-NADP<sup>+</sup> reductase; ATPase<sub>BSC</sub>: ATP synthase in the bundle sheath cell chloroplast.

# Supplemental Figure

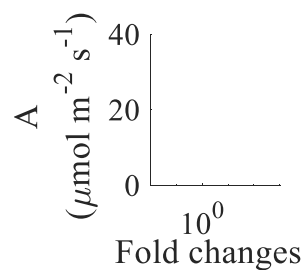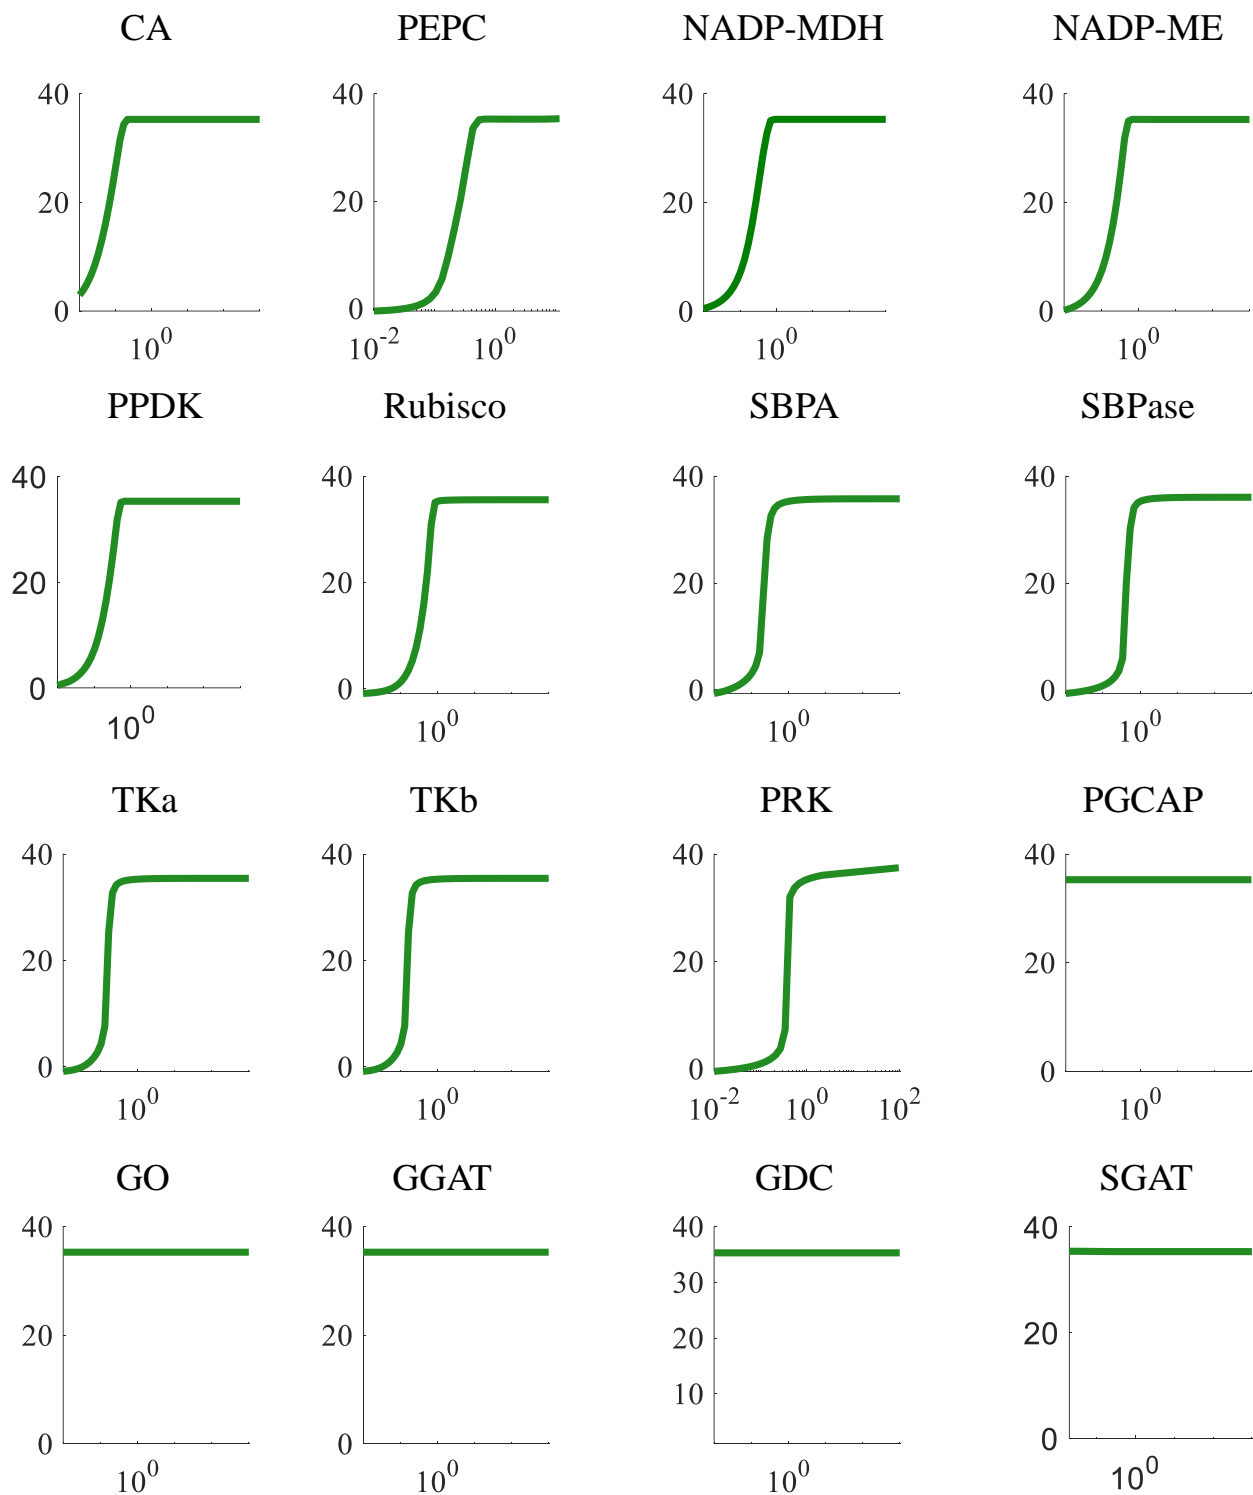

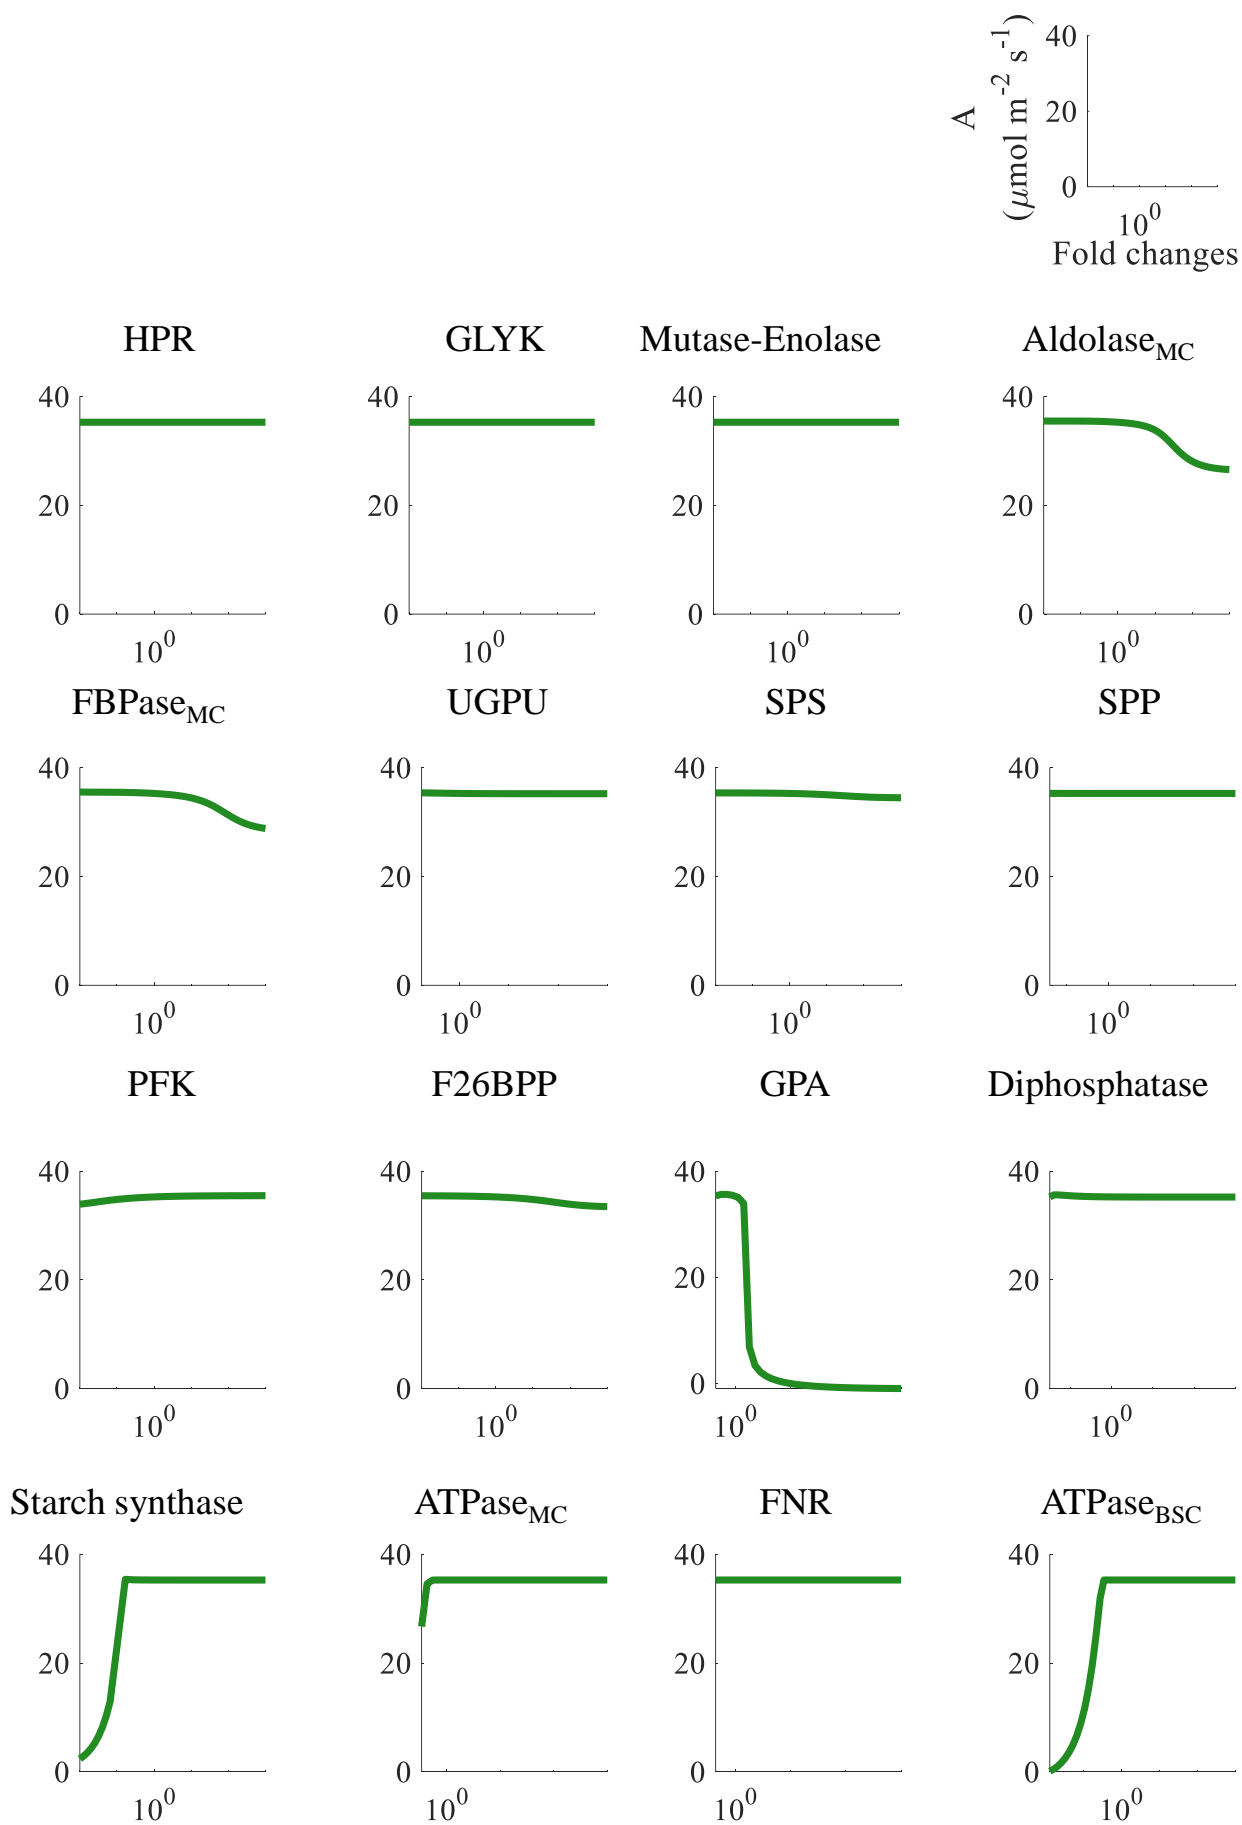

**Figure S1.**

- Figure S2. The response curves of PGA (a and b), T3P (c and d) and PEP (e and f) to the fold changes of enzymatic capacities. Aldolase<sub>MC</sub> (a, c and e) and FBPase<sub>MC</sub> (b, d and f) are the enzymes of sucrose synthesis in mesophyll cells.

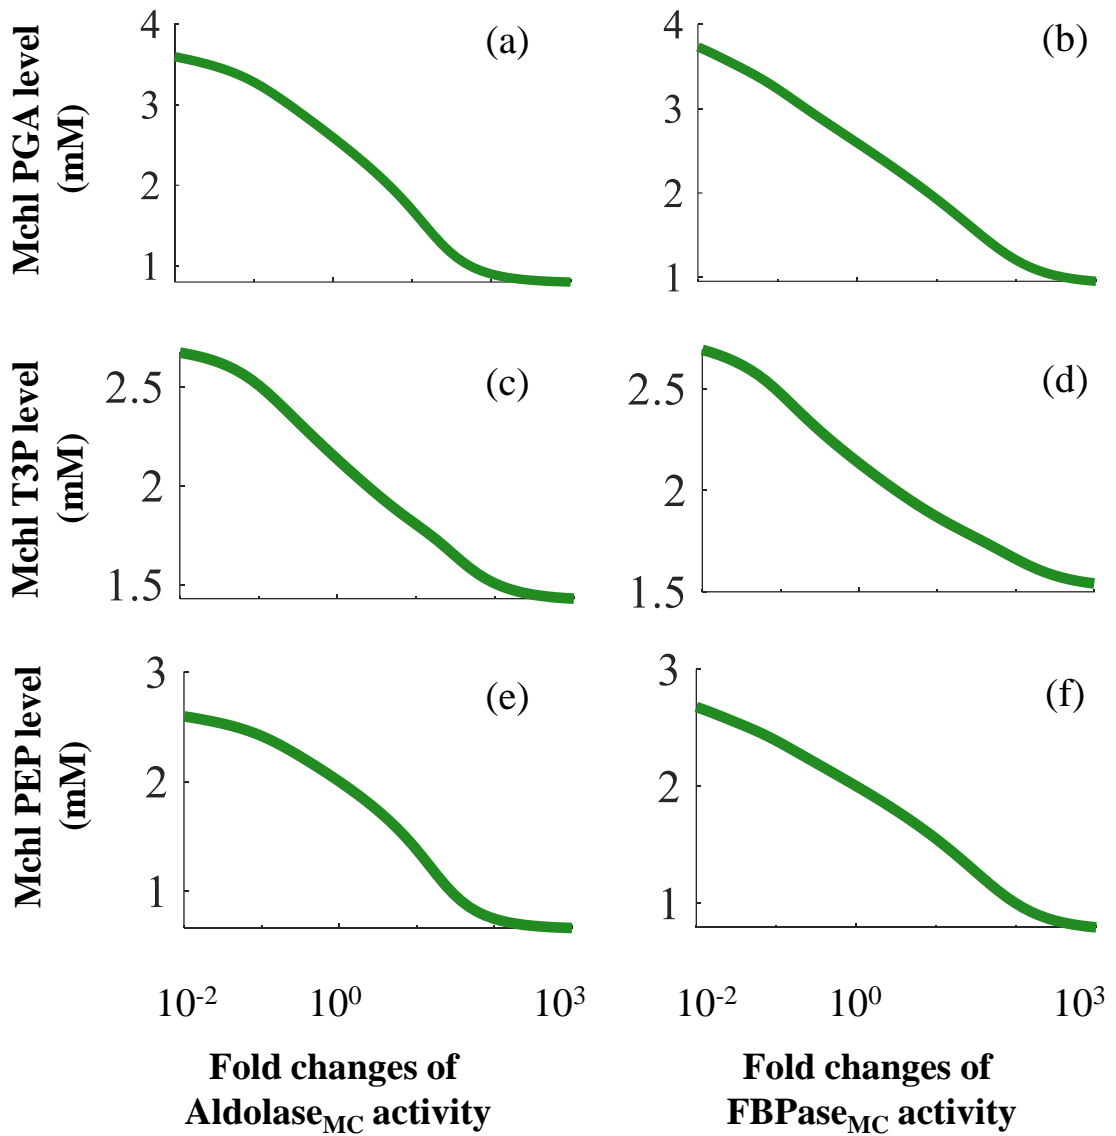

Supplement: kiac051_supplementary_data.pdf [file kiac051_supplementary_data.pdf]
